# Supplementary material for: Semantic-aware framework for zero-shot malware classification via attention-based relation network
Source: PeerJ journal article supplement (doi:10.7717/peerj-cs.3408), 2025-12-18
Supplement: SMART_IMPL_upload.zip [file output.docx]

Epoch 10/10, Loss: 0.0916

Performance Metrics:

Accuracy: 93.85%

Precision: 94.51%

Recall: 93.85%

F1-Score: 93.98%

Performance Metrics:

Classification Report:

precision recall f1-score support

Adposhel 1.00 1.00 1.00 65

Agent 0.85 0.86 0.85 64

Allaple 0.95 0.89 0.92 70

Amonetize 0.97 0.96 0.96 71

Androm 0.93 0.85 0.88 59

Autorun 0.93 0.85 0.89 75

BrowseFox 1.00 0.82 0.90 66

Dinwod 1.00 0.98 0.99 66

Elex 0.84 0.98 0.91 66

Expiro 0.99 0.84 0.90 79

Fasong 1.00 1.00 1.00 61

HackKMS 1.00 1.00 1.00 80

Hlux 1.00 0.99 0.99 83

Injector 0.82 0.89 0.85 61

InstallCore 1.00 0.98 0.99 59

MultiPlug 0.98 0.95 0.97 64

Neoreklami 0.96 0.99 0.97 79

Neshta 0.98 0.94 0.96 62

Other 0.90 0.86 0.88 77

Regrun 1.00 1.00 1.00 82

Sality 0.67 0.89 0.77 74

Snarasite 1.00 1.00 1.00 75

Stantinko 0.99 0.96 0.97 77

VBA 1.00 1.00 1.00 59

VBKrypt 0.78 0.94 0.85 66

Vilsel 1.00 0.97 0.99 80

accuracy 0.94 1820

macro avg 0.94 0.94 0.94 1820

weighted avg 0.95 0.94 0.94 1820

Confusion Matrix:

[[65 0 0 0 0 0 0 0 0 0 0 0 0 0 0 0 0 0 0 0 0 0 0 0

0 0]

[ 0 55 0 0 0 0 0 0 1 0 0 0 0 2 0 0 2 0 1 0 2 0 0 0

1 0]

[ 0 1 62 0 0 0 0 0 1 0 0 0 0 0 0 0 0 0 0 0 3 0 0 0

3 0]

[ 0 0 0 68 0 0 0 0 0 0 0 0 0 0 0 0 0 0 0 0 3 0 0 0

0 0]

[ 0 0 0 0 50 0 0 0 0 1 0 0 0 3 0 0 0 0 0 0 4 0 0 0

1 0]

[ 0 2 0 0 0 64 0 0 0 0 0 0 0 1 0 0 0 0 0 0 3 0 0 0

5 0]

[ 0 0 0 1 0 0 54 0 6 0 0 0 0 1 0 0 0 0 4 0 0 0 0 0

0 0]

[ 0 1 0 0 0 0 0 65 0 0 0 0 0 0 0 0 0 0 0 0 0 0 0 0

0 0]

[ 0 1 0 0 0 0 0 0 65 0 0 0 0 0 0 0 0 0 0 0 0 0 0 0

0 0]

[ 0 0 0 0 2 0 0 0 0 66 0 0 0 2 0 1 0 0 0 0 7 0 1 0

0 0]

[ 0 0 0 0 0 0 0 0 0 0 61 0 0 0 0 0 0 0 0 0 0 0 0 0

0 0]

[ 0 0 0 0 0 0 0 0 0 0 0 80 0 0 0 0 0 0 0 0 0 0 0 0

0 0]

[ 0 0 0 0 0 0 0 0 0 0 0 0 82 0 0 0 0 0 0 0 1 0 0 0

0 0]

[ 0 1 0 0 0 0 0 0 0 0 0 0 0 54 0 0 0 0 0 0 1 0 0 0

5 0]

[ 0 0 0 0 0 0 0 0 0 0 0 0 0 0 58 0 1 0 0 0 0 0 0 0

0 0]

[ 0 0 0 0 0 1 0 0 0 0 0 0 0 0 0 61 0 0 0 0 2 0 0 0

0 0]

[ 0 0 0 1 0 0 0 0 0 0 0 0 0 0 0 0 78 0 0 0 0 0 0 0

0 0]

[ 0 0 0 0 1 0 0 0 1 0 0 0 0 0 0 0 0 58 0 0 2 0 0 0

0 0]

[ 0 2 0 0 1 0 0 0 1 0 0 0 0 2 0 0 0 1 66 0 3 0 0 0

1 0]

[ 0 0 0 0 0 0 0 0 0 0 0 0 0 0 0 0 0 0 0 82 0 0 0 0

0 0]

[ 0 1 3 0 0 1 0 0 1 0 0 0 0 0 0 0 0 0 0 0 66 0 0 0

2 0]

[ 0 0 0 0 0 0 0 0 0 0 0 0 0 0 0 0 0 0 0 0 0 75 0 0

0 0]

[ 0 0 0 0 0 0 0 0 1 0 0 0 0 0 0 0 0 0 2 0 0 0 74 0

0 0]

[ 0 0 0 0 0 0 0 0 0 0 0 0 0 0 0 0 0 0 0 0 0 0 0 59

0 0]

[ 0 0 0 0 0 2 0 0 0 0 0 0 0 1 0 0 0 0 0 0 1 0 0 0

62 0]

[ 0 1 0 0 0 1 0 0 0 0 0 0 0 0 0 0 0 0 0 0 0 0 0 0

0 78]]
